# Supplementary material for: Transcriptome reveals differential expression of flavor and color in closely related strains of tomato (Solanum lycopersicum)
Source: PeerJ. 2025 Oct 7;13:e20113. doi: 10.7717/peerj.20113 (PMC12513376; doi:10.7717/peerj.20113)
Supplement: Supplemental Information 1 [file peerj-13-20113-s001.xlsx]

## Sheet: Sheet1
Solyc04g063210.3
Sample	FPKM	Relative Expression
19B	0.055388	1.18563
19B	0.117988	0.960046
19B	0.02951	0.878534
19R	0.081734	0.440466
19R	0.129213	0.398486
19R	0.089762	0.382721
20B	0.273639	0.976911
20B	0.150516	1.0432
20B	0.315202	0.981248
20R	0.151059	0.748808
20R	0.193536	0.887136
20R	0.100437	0.879026
Solyc03g032220.3
19B	0	0.89149
19B	0	1.05692
19B	0.113193	1.06131
19R	0	2.36847
19R	0	2.36647
19R	0.062885	2.32361
20B	0.564176	1.02354
20B	1.15436	0.896165
20B	1.24038	1.0902
20R	0	1.08803
20R	0	1.3713
20R	0	1.45195
Solyc11g013110.2.1
19B	36.0219	1.03113
19B	36.0572	1.03145
19B	36.8674	1.03031
19R	324.059	2.11361
19R	320.131	2.90614
19R	312.084	2.991
20B	25.199	1.0314
20B	27.105	1.03371
20B	26.9711	1.03143
20R	89.9251	2.96919
20R	102.391	2.00896
20R	90.6231	2.02262
Solyc02g083860.3
19B	1.49865	0.183236
19B	1.59216	0.152302
19B	2.19814	0.177931
19R	90.2204	0.912867
19R	85.2536	1.07058
19R	84.097	1.02323
20B	2.19614	0.0380161
20B	1.83145	0.0336837
20B	2.06453	0.0356217
20R	28.0694	1.05848
20R	26.9211	0.929643
20R	25.603	1.01625
Solyc09g091510.3
19B	0.564868	0.287371
19B	0.440062	0.319895
19B	0.569058	0.331087
19R	71.2449	0.988354
19R	75.6411	0.963254
19R	73.4954	1.05038
20B	0.994537	0.228226
20B	1.27956	0.207721
20B	1.00623	0.21532
20R	19.6152	0.924686
20R	15.4867	0.967998
20R	19.3408	1.1172
Solyc05g053550.3
19B	1.52026	1.10327
19B	1.18617	1.05318
19B	1.77405	0.860626
19R	184.817	3.05394
19R	185.067	2.96406
19R	185.639	3.10906
20B	1.73266	0.0293854
20B	2.418	0.02739
20B	2.95074	0.0266951
20R	39.8298	0.896144
20R	41.5232	1.07844
20R	37.6538	1.03473
Solyc01g009370.2
19B	0.520939	1.10488
19B	0.538332	0.865661
19B	0.659139	1.04553
19R	0.163028	0.28537
19R	0.304536	0.255824
19R	0.284532	0.231233
20B	0.323179	1.05798
20B	0.391222	0.976134
20B	0.344047	0.968308
20R	0	0.626421
20R	0	0.690541
20R	0	0.634819
Solyc03g117600.3
19B	8.16188	0.227923
19B	8.48084	0.282721
19B	8.59573	0.269552
19R	13.6186	1.06709
19R	14.159	0.853022
19R	14.5532	1.09859
20B	18.9247	0.816463
20B	18.3013	1.05203
20B	18.0628	1.16423
20R	6.60435	0.700651
20R	7.99473	0.556132
20R	8.10305	0.729149
Solyc10g078220.2
19B	0.066694	1.06684
19B	0	0.934572
19B	0.050401	1.00297
19R	0	27.582
19R	0	29.0402
19R	0.168869	29.3458
20B	0	0.94077
20B	0	0.924
20B	0	1.15039
20R	0	13.0753
20R	0.128209	13.9325
20R	0.138171	13.872
Solyc07g049530.3
19B	713.842	0.961042
19B	692.543	0.988441
19B	705.687	1.05271
19R	854.855	0.961843
19R	818.486	1.10734
19R	836.358	0.938891
20B	760.071	1.22347
20B	755.321	1.17473
20B	772.167	1.17157
20R	270.769	0.185731
20R	278.183	0.147053
20R	263.446	0.16354
Solyc02g036350.3
19B	23.9972	0.0778679
19B	23.8301	0.0795796
19B	23.5845	0.0777225
19R	107.436	0.847948
19R	103.883	0.994365
19R	100.495	1.186
20B	5.98138	1.68104
20B	6.12132	1.98237
20B	5.66198	1.93788
20R	3.08031	0.881931
20R	2.08803	1.01028
20R	1.77144	1.12234
Solyc12g009300.2
19B	11.2213	1.03147
19B	12.8383	1.09425
19B	12.1829	0.885992
19R	30.3677	1.93637
19R	31.2309	2.41698
19R	29.5947	2.23746
20B	13.6969	1.42491
20B	14.4089	1.33425
20B	14.8235	1.85952
20R	10.3685	1.16264
20R	11.2068	1.09517
20R	10.8876	1.25042
Solyc08g066100.3
19B	15.1118	1.02937
19B	15.0941	0.887071
19B	14.9462	1.09514
19R	16.4397	0.873716
19R	16.6	1.14279
19R	15.8194	1.00153
20B	8.5774	5.05655
20B	9.05636	4.57253
20B	7.89431	5.71271
20R	2.15281	0.0759411
20R	2.81788	0.0795604
20R	2.3651	0.0866412
Solyc09g011810.3
19B	1.7592	0.139887
19B	1.68022	0.152338
19B	2.17582	0.15777
19R	3.45936	0.940295
19R	3.59783	0.974744
19R	3.61544	1.09105
20B	0.29289	1.17889
20B	0.38155	0.88356
20B	0.141631	0.960045
20R	0.032118	0.126866
20R	0	0.138001
20R	0	0.165013
Solyc10g086730.2
19B	3.08655	0.2259
19B	4.64408	0.282733
19B	3.59888	0.248181
19R	6.35548	1.03071
19R	6.17744	0.966265
19R	6.24684	1.00407
20B	3.51212	1.02783
20B	3.59356	0.962019
20B	3.78952	1.01134
20R	1.66075	0.388837
20R	1.85704	0.3731
20R	1.36211	0.444739
Solyc02g062340.3
19B	4.09924	0.997809
19B	3.47208	1.07823
19B	4.26445	0.929482
19R	6.86527	3.87401
19R	6.48437	3.58913
19R	6.82651	4.6197
20B	0.538118	1.11944
20B	0.461034	0.967819
20B	0.484404	0.923006
20R	0.199813	0.314219
20R	0	0.309265
20R	0.221485	0.305683
Solyc09g008840.3
19B	30.6619	0.939305
19B	32.5088	1.06121
19B	31.6706	1.00321
19R	23.0083	0.289669
19R	23.8094	0.262544
19R	22.7049	0.236764
20B	21.9133	0.964344
20B	22.1617	1.06687
20B	23.1991	0.971974
20R	7.94707	0.464305
20R	6.97813	0.455502
20R	8.44177	0.529595
Solyc05g053100.3.1
19B	4.11042	1.09657
19B	3.8508	0.947285
19B	3.97905	0.96268
19R	3.79756	0.995563
19R	4.15965	1.02423
19R	4.01144	0.980692
20B	2.30601	0.0956876
20B	2.63663	0.0811931
20B	2.90931	0.0866228
20R	0.955988	0.0282416
20R	0.798302	0.0318976
20R	0.682087	0.0268633
Solyc05g009530.3
19B	44.9577	5.76296
19B	45.1514	6.91472
19B	46.6641	5.63298
19R	22.1502	0.98133
19R	21.9723	1.11825
19R	23.7244	0.91127
20B	42.4233	4.07488
20B	44.6623	4.94074
20B	41.1069	4.98894
20R	28.6282	0.774921
20R	29.5635	0.74156
20R	29.0346	0.76907
Solyc12g099260.2
19B	3.53824	4.10059
19B	3.22894	4.57164
19B	2.55401	4.55314
19R	2.26186	0.950409
19R	2.63605	0.984725
19R	2.0426	1.0685
20B	1.73362	1.01913
20B	1.70152	1.02252
20B	2.05177	0.959619
20R	0.306741	0.182891
20R	0.179504	0.180413
20R	0.216742	0.186864
Solyc07g055840.3
19B	20.267	0.0206166
19B	19.156	0.0235864
19B	21.4667	0.0189673
19R	42.9024	0.922538
19R	41.3333	1.20266
19R	41.1804	0.901306
20B	6.31926	0.876227
20B	5.79305	1.1398
20B	6.75075	1.00127
20R	1.78038	0.00727809
20R	1.53594	0.00613052
20R	1.47836	0.00877749
Solyc04g055030.2
19B	7.03034	0.87312
19B	8.5512	0.693798
19B	7.76275	0.809138
19R	10.9473	1.00511
19R	10.6244	0.856212
19R	11.365	1.162
20B	1.07239	1.08608
20B	0.994505	0.907474
20B	1.28478	1.01462
20R	0.085726	0.073327
20R	0	0.0627876
20R	0	0.0595497
Solyc04g055020.2
19B	5.50847	0.993601
19B	6.10106	0.979401
19B	6.26045	1.02761
19R	14.209	6.92009
19R	14.3155	5.35112
19R	14.6158	6.24532
20B	2.40239	0.874124
20B	1.40939	1.10747
20B	1.59593	1.03298
20R	0.164497	0.270462
20R	0	0.345683
20R	0	0.279732
Solyc10g079480.1
19B	0.088313	1.01727
19B	0.073852	0.923874
19B	0.163294	1.06402
19R	0.150504	3.50467
19R	0.643442	3.52744
19R	0.381239	3.28363
20B	0.15427	0.799565
20B	0.03854	0.950321
20B	0.175053	1.31606
20R	0.151727	0.747288
20R	0.062186	1.20465
20R	0.20667	0.891946
Solyc07g056570.1
19B	11.494	1.47872
19B	10.967	0.541655
19B	11.618	1.24851
19R	38.6514	5.18577
19R	37.4729	4.10282
19R	36.2326	5.59579
20B	11.4858	0.132524
20B	11.277	0.129078
20B	10.9504	0.147932
20R	13.5926	1.10134
20R	16.277	0.959129
20R	14.6709	0.946673
Solyc04g050930.3
19B	19.8566	0.907064
19B	19.368	1.0354
19B	19.6075	1.06477
19R	17.1982	0.784918
19R	16.2589	1.19581
19R	16.2571	0.732967
20B	15.7911	0.803156
20B	16.5749	0.915969
20B	16.7775	1.35931
20R	5.3224	0.609434
20R	4.33077	0.5092
20R	4.40311	0.525005
Solyc05g010180.3
19B	11.8221	27.9272
19B	10.2317	25.9612
19B	11.5397	22.5047
19R	8.45865	0.890418
19R	8.83642	1.05305
19R	8.77783	1.06649
20B	13.5125	0.786673
20B	14.9887	1.20247
20B	14.4701	1.05714
20R	5.63281	0.428964
20R	4.99175	0.342162
20R	5.60073	0.338504
Solyc02g090890.3
19B	3.81465	0.441578
19B	3.1635	0.493818
19B	3.97831	0.529801
19R	7.08592	1.06241
19R	7.281	0.900367
19R	7.115	1.04541
20B	3.90567	0.199855
20B	4.63697	0.146948
20B	4.37705	0.187458
20R	9.15581	0.844951
20R	9.66221	0.957699
20R	9.65822	1.23578
Solyc03g043890.3
19B	0	0.0853814
19B	0	0.097997
19B	0	0.0995153
19R	0.258934	1.32235
19R	0.335617	1.18713
19R	0.115549	1.14288
20B	0	0.341578
20B	0	0.493818
20B	0.035097	0.329801
20R	0	0.0382299
20R	0	0.0559681
20R	0	0.0423702
Solyc02g036350.3
19B	23.9972	0.3126
19B	23.8301	0.2663
19B	23.5845	0.3277
19R	107.436	1.1393
19R	103.883	1.1807
19R	100.495	1.2748
20B	5.98138	3.7751
20B	6.12132	2.8118
20B	5.66198	2.9627
20R	3.08031	0.488
20R	2.08803	0.302
20R	1.77144	0.3931
Solyc07g026650.3
19B	4.13954	0.2011
19B	4.45686	0.236
19B	3.89026	0.3887
19R	27.1258	1.19448
19R	25.6499	1.2106
19R	23.7392	1.1743
20B	6.70395	2.1399
20B	6.32193	3.2709
20B	6.3058	2.8756
20R	4.9499	0.7839
20R	5.50028	0.842
20R	4.96921	0.9365
