# Supplementary material for: Transcriptome reveals differential expression of flavor and color in closely related strains of tomato (Solanum lycopersicum)
Source: PeerJ. 2025 Oct 7;13:e20113. doi: 10.7717/peerj.20113 (PMC12513376; doi:10.7717/peerj.20113)
Supplement: Supplemental Information 2 [file peerj-13-20113-s002.xls]

## Sheet: Sheet1
ITEM TO CHECK	IMPORTANCE	CHECKLIST
EXPERIMENTAL DESIGN
Definition of experimental and control groups	E	Experimental group No.19 yellow tomatoes, control group No.20 red tomatoes(Page 4, line 155)
Number within each group	E	The experimental and control groups each contained 3 samples(Page 4, line 163)
Assay carried out by core lab or investigator's lab?	D	This experiment was done in the author's laboratory(Page 1, line 1-2)
Acknowledgement of authors' contributions	D	Thank you to the lab members for their help with data mobiles and analysis(Page 1, line 1-2)
SAMPLE
Description	E	Fruits of yellow tomato No. 19 and red tomato No. 20 that were uniformly grown, free from mechanical damage, and free from pests and diseases were selected as test materials at two different periods, i.e., decoloration (Br, 40 days after flowering) and ripening (MF, 55 days after flowering).(Page 4, line 159-160)
Volume/mass of sample processed	D
Microdissection or macrodissection	E	NO
Processing procedure	E	Samples were taken from the pericarp and pulp of the circum-equatorial region of the fruits, with three biological replicates for each period, and five fruits per replicate.(Page 4, line 162-164)
If frozen - how and how quickly?	E	Samples are stored in a refrigerator at -80°C(Page 4, line 164-165)
If fixed - with what, how quickly?	E	NO
Sample storage conditions and duration (especially for FFPE samples)	E	Samples are stored frozen at -80°C for up to 3 months.(Page 4, line 164-165)
NUCLEIC ACID EXTRACTION
Procedure and/or instrumentation	E	Use the FastPure Plant Total RNA Isolation Kit brand RNA extraction kit and follow the instructions without modification.(Page 5, line 177-178)
Name of kit and details of any modifications	E	Use the FastPure Plant Total RNA Isolation Kit brand RNA extraction kit and follow the instructions without modification.(Page 5, line 177-178)
Source of additional reagents used	D
Details of DNase or RNAse treatment	E	DNase treatment was used to remove genomic DNA contamination.(Page 5, line 176-177)
Contamination assessment (DNA or RNA)	E	Detection of RNA purity by gel electrophoresis(Page 5, line 177-178)
Nucleic acid quantification	E	RNA quantification was performed using NanoDrop.(Page 5, line 177-178)
Instrument and method	E	Use the FastPure Plant Total RNA Isolation Kit brand RNA extraction kit and follow the instructions without modification.(Page 5, line 177-178)
Purity (A260/A280)	D
Yield	D
RNA integrity method/instrument	E	RNA integrity was assayed by Agilent Bioanalyzer.(Page 5, line 177-178)
RIN/RQI or Cq of 3' and 5' transcripts	E	8.5(Page 5, line 177-178)
Electrophoresis traces	D
Inhibition testing (Cq dilutions, spike or other)	E	No PCR inhibition detected
REVERSE TRANSCRIPTION
Complete reaction conditions	E	30 minutes at 55°C with PrimeScript™ RT Kit(Page 5, line 181-183)
Amount of RNA and reaction volume	E	The amount of RNA was 1 μg and the volume of the reaction system was 20 μL.(Page 5, line 181-183)
Priming oligonucleotide (if using GSP) and concentration	E	Random primers were used at a concentration of 0.5 μg/μL.(Page 5, line 185-187)
Reverse transcriptase and concentration	E	Using M-MLV reverse transcriptase at 200 U/μL(Page 5, line 188-190)
Temperature and time	E	The reaction was carried out at 55°C for 30 minutes using the Paul Kuang Brand Reverse Transcription Kit.(Page 5, line 188-189)
Manufacturer of reagents and catalogue numbers	D
Cqs with and without RT	D*
Storage conditions of cDNA	D
qPCR TARGET INFORMATION
If multiplex, efficiency and LOD of each assay.	E	NO
Sequence accession number	E	GCA_000188115.3(Page 5, line 184)
Location of amplicon	D
Amplicon length	E	150bp(Page 5, line 184-185)
In silico specificity screen (BLAST, etc)	E
Pseudogenes, retropseudogenes or other homologs?	D
Sequence alignment	D
Secondary structure analysis of amplicon	D
Location of each primer by exon or intron (if applicable)	E	Located on the exon.(Page 5, line 184-186)
What splice variants are targeted?	E	NO
qPCR OLIGONUCLEOTIDES
Primer sequences	E	F:GGAATGGGACAGAAGGAT R:CAGTCAGGAGAACAGGGT(Page 5, line 185-186)
RTPrimerDB Identification Number	D
Probe sequences	D**	NO
Location and identity of any modifications	E	NO
Manufacturer of oligonucleotides	D
Purification method	D
qPCR PROTOCOL
Complete reaction conditions	E	The reaction temperature was 95°C for 5 min of pre-denaturation followed by 40 cycles of 95°C denaturation for 15 sec,60°C annealing and extension for 30 sec.(Page 5, line 197-203)
Reaction volume and amount of cDNA/DNA	E	The volume of the reaction system was 10 μL, and the amount of template cDNA added was 1 μL.(Page 5, line 197-203)
Primer, (probe), Mg++ and dNTP concentrations	E	The primer concentration was 0.2 μM, the Mg ion concentration was 2.5 mM, and the dNTP concentration was 0.2 mM. probe-free(Page 5, line 197-203)
Polymerase identity and concentration	E	Taq DNA polymerase was used at a concentration of 1 U/μL.(Page 5, line 197-203)
Buffer/kit identity and manufacturer	E	NO
Exact chemical constitution of the buffer	D
Additives (SYBR Green I, DMSO, etc.)	E	NO
Manufacturer of plates/tubes and catalog number	D
Complete thermocycling parameters	E	The reaction temperature was 95°C for 5 min of pre-denaturation followed by 40 cycles of 95°C denaturation for 15 sec,60°C annealing and extension for 30 sec.(Page 5, line 197-203)
Reaction setup (manual/robotic)	D
Manufacturer of qPCR instrument	E	Chongqing Baoguang(Page 5, line 197-203)
qPCR VALIDATION
Evidence of optimisation (from gradients)	D
Specificity (gel, sequence, melt, or digest)	E	Specificity was confirmed by gel electrophoresis and melting curve analysis.(Page 5, line 200-203)
For SYBR Green I, Cq of the NTC	E	NO
Standard curves with slope and y-intercept	E	The slope is -3.32 and the y-axis intercept is 38.5.(Page 5, line 200-203)
PCR efficiency calculated from slope	E	98%(Page 5, line 200-203)
Confidence interval for PCR efficiency or standard error	D
r2 of standard curve	E	0.998(Page 5, line 200-203)
Linear dynamic range	E	10^2-10^8 copies/μL.(Page 5, line 200-203)
Cq variation at lower limit	E	Cq values were stable with a coefficient of variation of less than 5%.(Page 5, line 200-203)
Confidence intervals throughout range	D
Evidence for limit of detection	E	10 copies/μL(Page 5, line 200-203)
If multiplex, efficiency and LOD of each assay.	E	NO
DATA ANALYSIS
qPCR analysis program (source, version)	E	GraphPad.Prism brand qPCR analysis software, version 9.5, was used.(Page 5, line 199-120)
Cq method determination	E	Determine the Cq value using the automatic threshold setting method.(Page 5, line 199-120)
Outlier identification and disposition	E	Outlier results were identified by comparing the difference between the Ct value and the mean Ct value and were eliminated.(Page 5, line 200-203)
Results of NTCs	E	Outlier results were identified by comparing the difference between the Ct value and the mean Ct value and were eliminated.(Page 5, line 200-203)
Justification of number and choice of reference genes	E	One;Universal Tomato(Page 5, line 197-200)
Description of normalisation method	E	Relative quantification using internal reference genes.(Page 5, line 200-203)
Number and concordance of biological replicates	D
Number and stage (RT or qPCR) of technical replicates	E	Three technical replicates were performed for each sample.(Page 4, line 162-163)
Repeatability (intra-assay variation)	E	Evaluate reproducibility by comparing results from different experimental batches(Page 4, line 162-163)
Reproducibility (inter-assay variation, %CV)	D
Power analysis	D
Statistical methods for result significance	E	Statistical analysis was performed using t-test or ANOVA.(Page 5, line 200-203)
Software (source, version)	E	GraphPad.Prism brand qPCR analysis software, version 9.5, was used.(Page 5, line 199-120)
Cq or raw data submission using RDML	D
Table 1. MIQE checklist for authors, reviewers and editors. All essential information (E) must be submitted with the manuscript. Desirable
information (D) should be submitted if available. If using primers obtained from RTPrimerDB, information on qPCR target, oligonucleotides,
protocols and validation is available from that source.
*: Assessing the absence of DNA using a no RT assay is essential when first extracting RNA. Once the sample has been validated as
RDNA-free, inclusion of a no-RT control is desirable, but no longer essential.
**: Disclosure of the probe sequence is highly desirable and strongly encouraged. However, since not all commercial pre-designed assay
vendors provide this information, it cannot be an essential requirement. Use of such assays is advised against.
